# Supplementary material for: Piperazine ferulate prevents high-glucose-induced filtration barrier injury of glomerular endothelial cells
Source: PubMed Central journal article supplement — Exp Ther Med. 2021 Aug 13;22(4):1175. doi: 10.3892/etm.2021.10607 (PMC8393711; doi:10.3892/etm.2021.10607), 2021-08-13

Figure S1. Western blotting to confirm transfection efficiency of si-AMPK-mediated knockdown. Western blot of AMPK and  $\beta$ -actin expression following transfection with si-AMPK or the si-NC. si, small interfering; NC, negative control; AMPK, adenosine monophosphate-activated protein kinase.

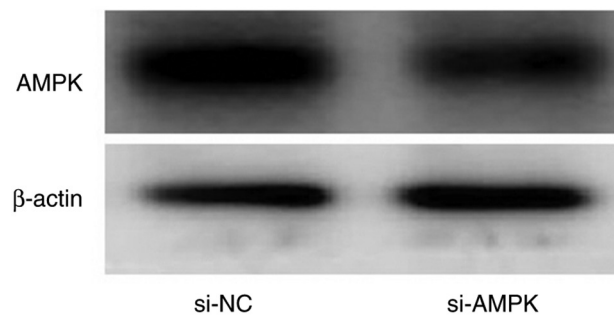

Supplement: Supplementary_Data.pdf [file Supplementary_Data.pdf]
